# Supplementary material
Source: Research Square preprint supplement (doi:10.21203/rs.3.rs-9707434/v1)
Supplement: Supplementary file 1 [file 83d73b2df02af5cccaa2dac0.docx]

**Appendix A: Variable Definitions and Data Sources**

| **Indicator** | **WDI Code** | **Role** | **Missing (%)** |
| --- | --- | --- | --- |
| Poverty headcount $2.15/day (2017 PPP) | SI.POV.DDAY | Outcome (Y) | 66.8% |
| Life expectancy at birth (years) | SP.DYN.LE00.IN | Human (H) | 0.4% |
| Under-5 mortality per 1,000 (reversed) | SH.DYN.MORT | Human (H) | 8.3% |
| Primary school completion (%) | SE.PRM.CMPT.ZS | Human (H) | 33.3% |
| Access to electricity (% population) | EG.ELC.ACCS.ZS | Institutional (I) | 5.5% |
| Internet users per 100 people | IT.NET.USER.ZS | Technology (T) | 16.5% |
| Mobile subscriptions per 100 people | IT.CEL.SETS | Technology (T) | 7.8% |
| Gini coefficient [EXCLUDED] | SI.POV.GINI | — | 72.1% |
| Adult literacy rate [EXCLUDED] | SE.ADT.LITR.ZS | — | 71.8% |
| R&D expenditure % GDP [EXCLUDED] | GB.XPD.RSDV.GD.ZS | — | 56.7% |
| High-technology exports [EXCLUDED] | TX.VAL.TECH.MF.ZS | — | 49.7% |

*Note: Missing rates computed over 2000–2023, 266 countries (before sample restriction). Indicators marked [EXCLUDED] were dropped due to structural missingness exceeding 50%, which risks systematic bias toward better-governed, higher-income reporting countries.*

**Appendix B: PCA Loadings and Variance Explained**

**Table B1: Human Capacity Pillar (H) — PCA Results**

| **Indicator** | **PC1 Loading** | **Communality** |
| --- | --- | --- |
| Life expectancy at birth (SP.DYN.LE00.IN) | 0.621 | 0.386 |
| Under-5 mortality, reversed (SH.DYN.MORT) | 0.598 | 0.358 |
| Primary school completion (SE.PRM.CMPT.ZS) | 0.507 | 0.257 |
| Variance explained by PC1 | 85.7% | — |

*Note: PCA conducted on within-year z-scored indicators. All three indicators load positively on PC1, confirming that higher H scores uniformly indicate greater human capability.*

**Table B2: Technological Access Pillar (T) — PCA Results**

| **Indicator** | **PC1 Loading** | **Communality** |
| --- | --- | --- |
| Internet users per 100 (IT.NET.USER.ZS) | 0.707 | 0.500 |
| Mobile subscriptions per 100 (IT.CEL.SETS) | 0.707 | 0.500 |
| Variance explained by PC1 | 60.9% | — |

*Note: Lower variance explained (60.9% vs 85.7% for H) reflects that internet and mobile penetration diverge across countries some have high mobile but low internet, particularly in earlier years of th*
